# Supplementary material
Source: PubMed Central journal article supplement (PMC4830475)

## Supplemental Material

**Supplemental Figure S1.** Examining performance, when exposed to 100 trials per session, on a pairwise discrimination task involving top-down processing across 20-trial bins in wild-type mice (WT) treated with vehicle (A) 10 mg/kg (B) or 30 mg/kg BQCA (C) and M<sub>1</sub> KO mice treated with vehicle (D) or 10 mg/kg BQCA (E). Data expressed as number of trials correct per 20-trial bins; individual points were excluded if all 20 trials were not completed for a respective bin.

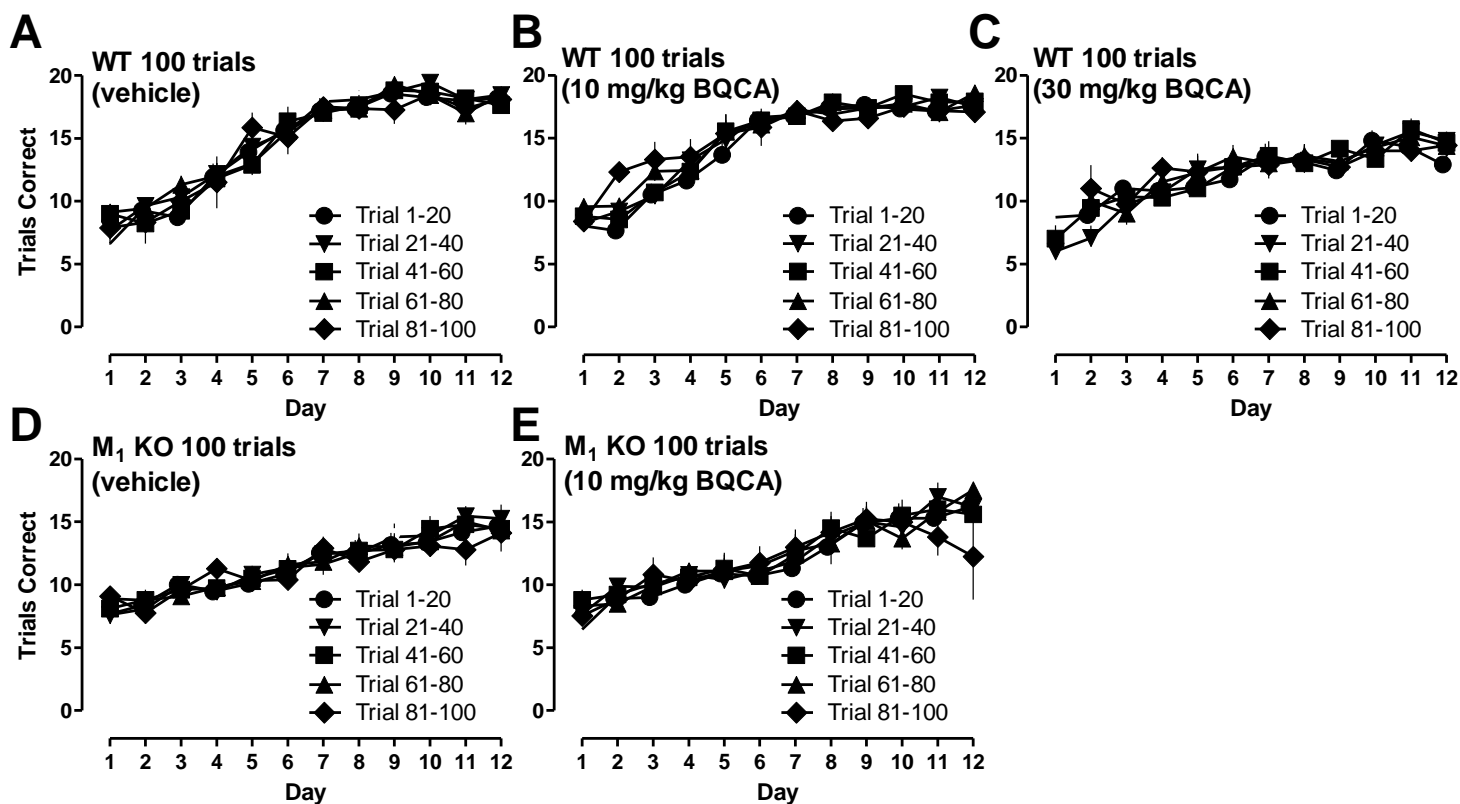

**Supplemental Figure 2.** Examining performance, when exposed to 60 trials per session, on a pairwise discrimination task involving top-down processing across 20-trial bins in wild-type mice (WT) treated with vehicle (A), 1 mg/kg (B) or 10 mg/kg BQCA (C) and  $M_1$  KO mice treated with vehicle (D) or 10 mg/kg BQCA (E). Data expressed as number of trials correct per 20-trial bins; individual points were excluded if all 20 trials were not completed for a respective bin.

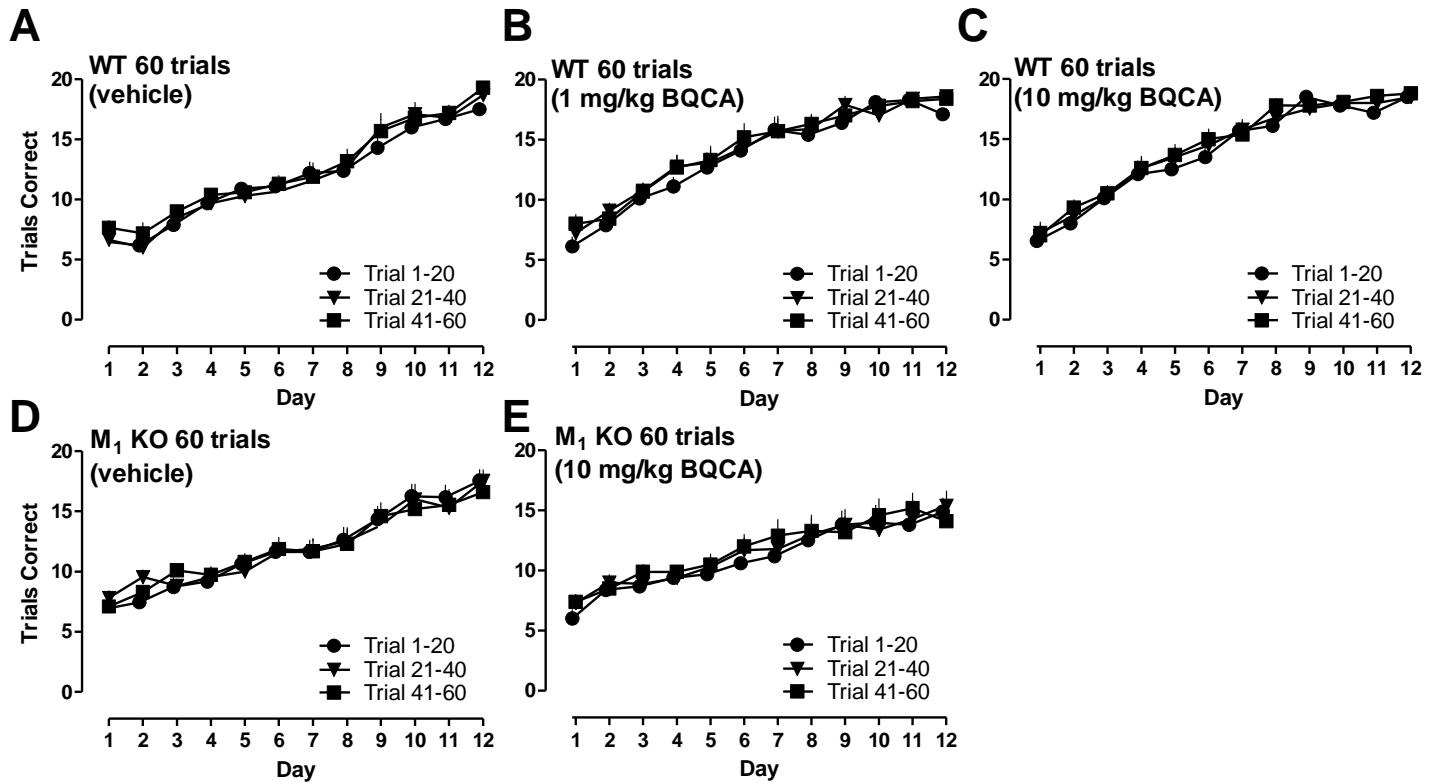

Supplement: NIHMS774506-supplement-Supllemental.pdf [file NIHMS774506-supplement-Supllemental.pdf]
